# Supplementary material for: Practical synthesis of ECH and epoxyquinols A and B from (−)-shikimic acid
Source: Royal Society of Chemistry journal article supplement (doi:10.1039/d2ob00559j), 2022-01-01

Supporting information

**Practical Synthesis of ECH and Epoxyquinols A and B from (–)-Shikimic Acid**

Guiyin Luo, Yuanliang Jia, Yue Hu, Folei Wu, Maolin Wang, and Xiaochuan Chen\*

*Key Laboratory of Green Chemistry & Technology of Ministry of Education, College of Chemistry,*

*Sichuan University, Chengdu 610064, PR China*

*E-mail:* [chenxc@scu.edu.cn](mailto:chenxc@scu.edu.cn)

Table of contents

Copies of  $^1\text{H}$  and  $^{13}\text{C}$  Spectra for compounds..... S2

$^1\text{H}$  NMR (400MHz,  $\text{CDCl}_3$ ) and  $^{13}\text{C}$  NMR (100MHz,  $\text{CDCl}_3$ ) spectra of **9**

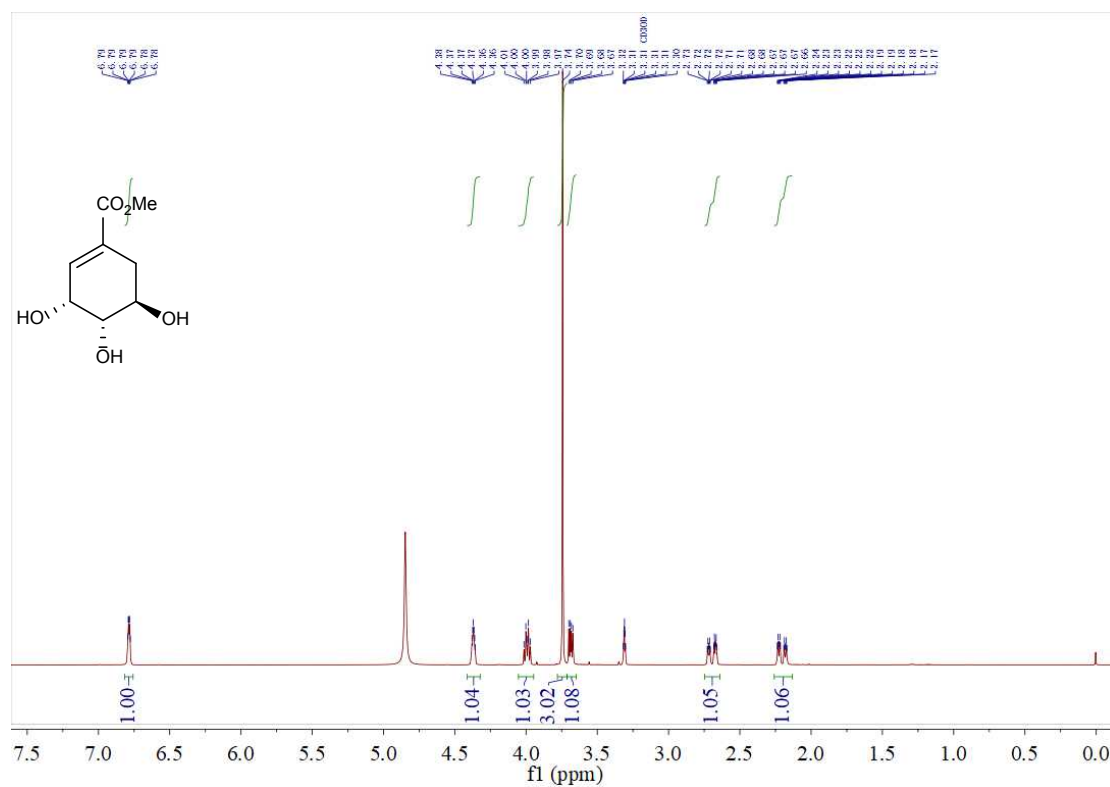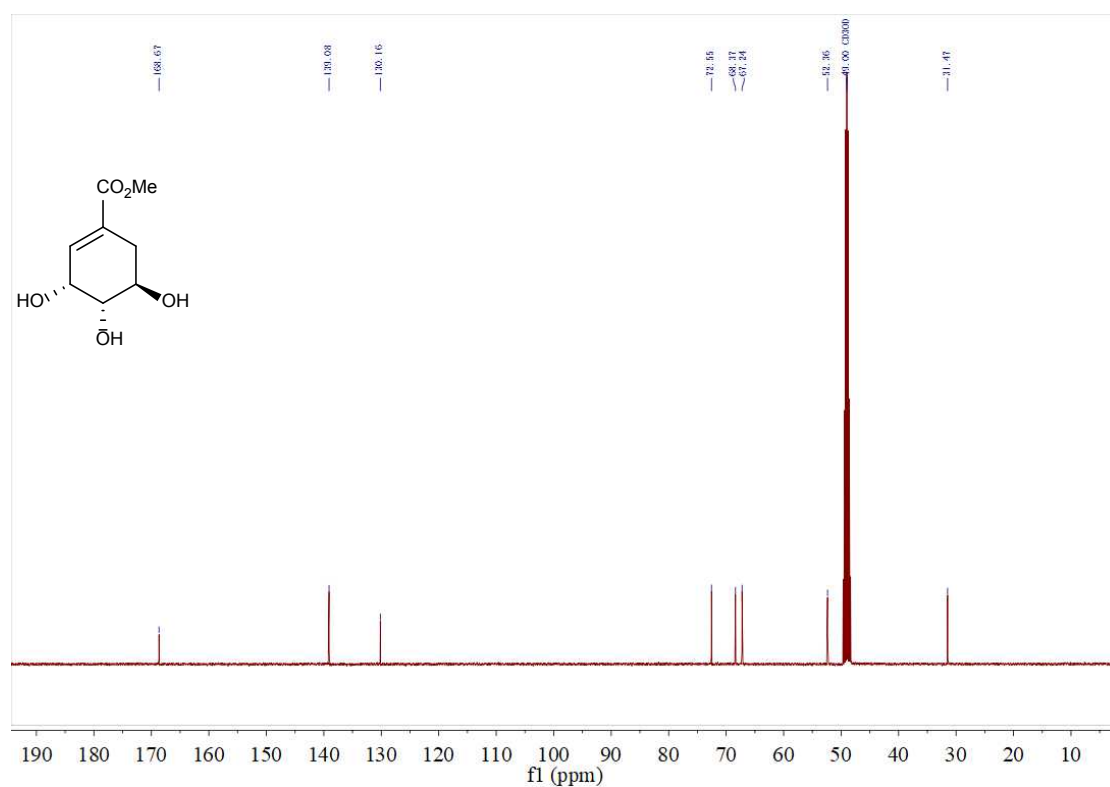

<sup>1</sup>H NMR (400MHz, CDCl<sub>3</sub>) and <sup>13</sup>C NMR (100MHz, CDCl<sub>3</sub>) spectra of **10**

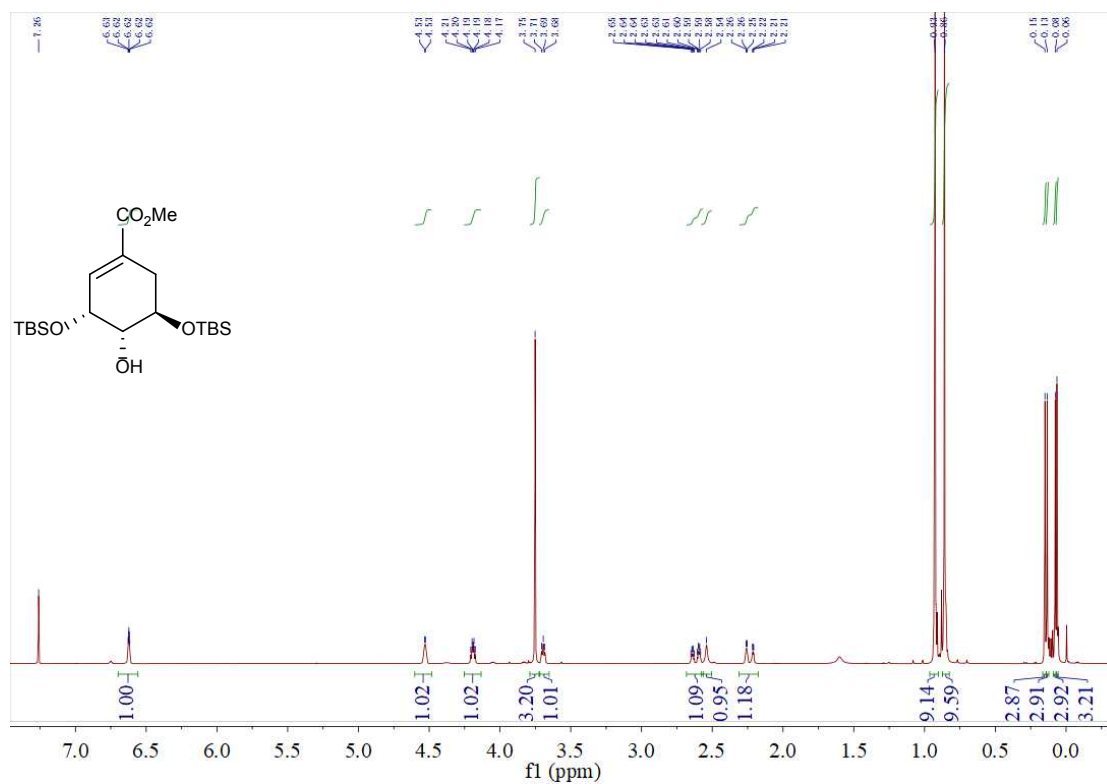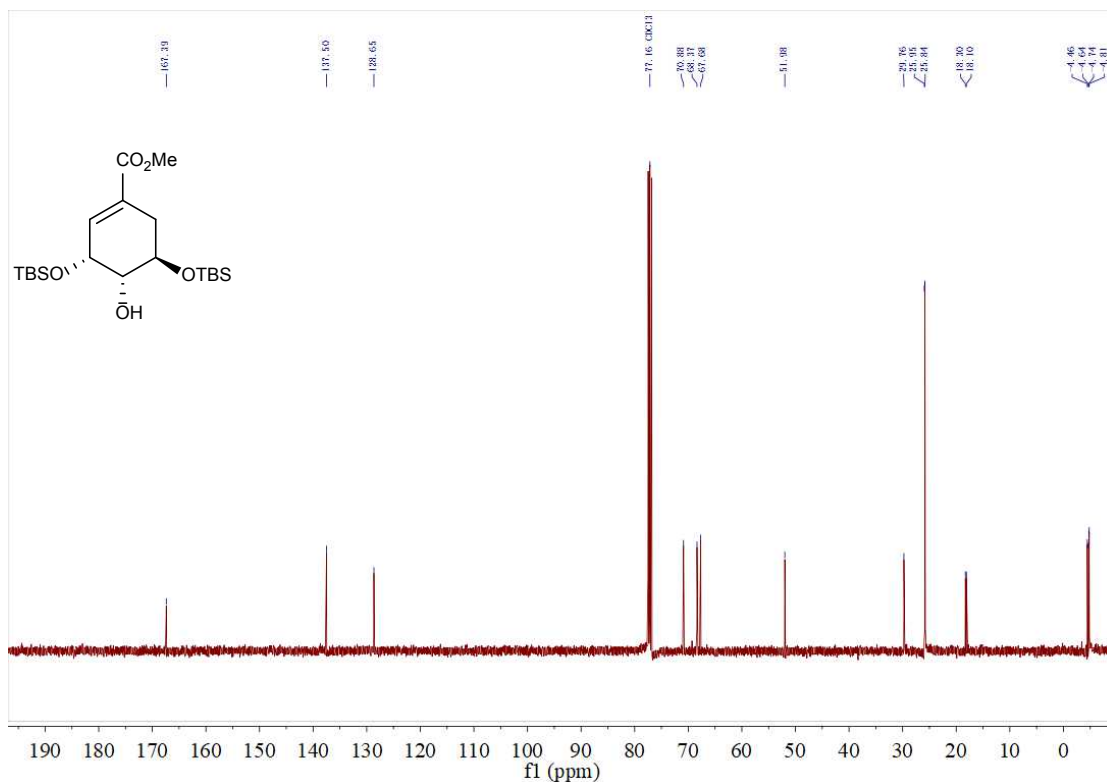

<sup>1</sup>H NMR (400MHz, CDCl<sub>3</sub>) and <sup>13</sup>C NMR (100MHz, CDCl<sub>3</sub>) spectra of **11**

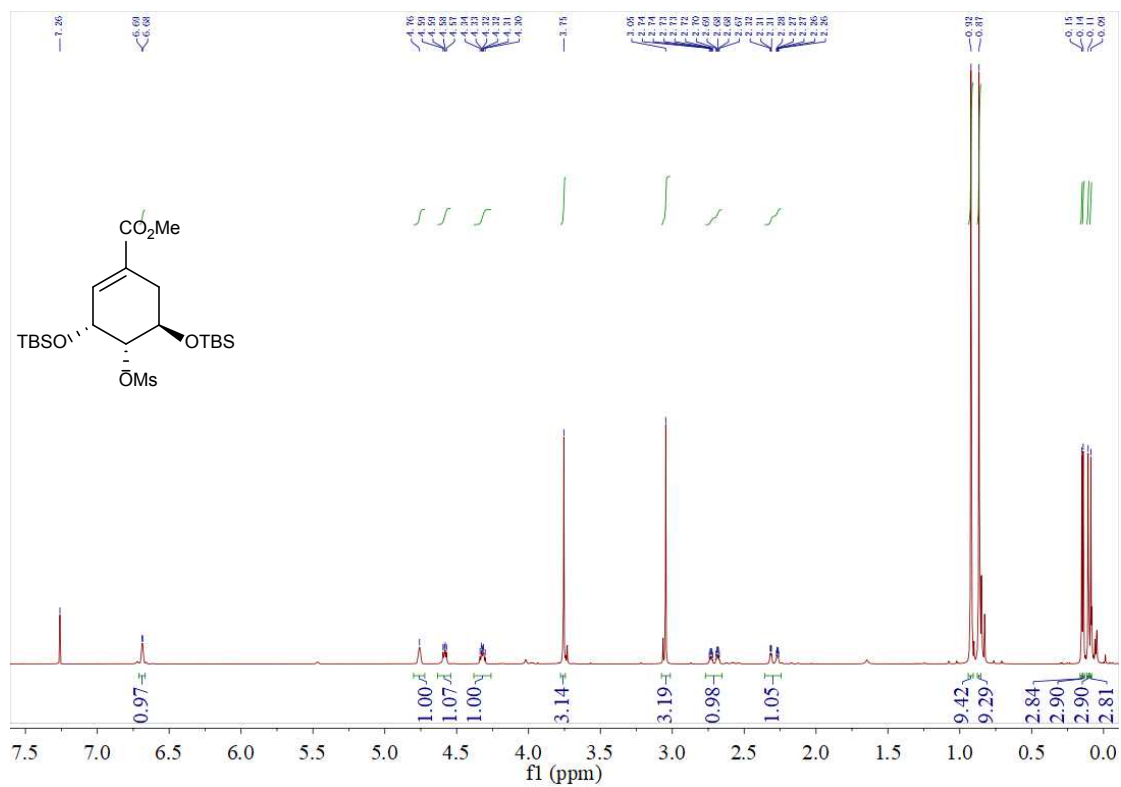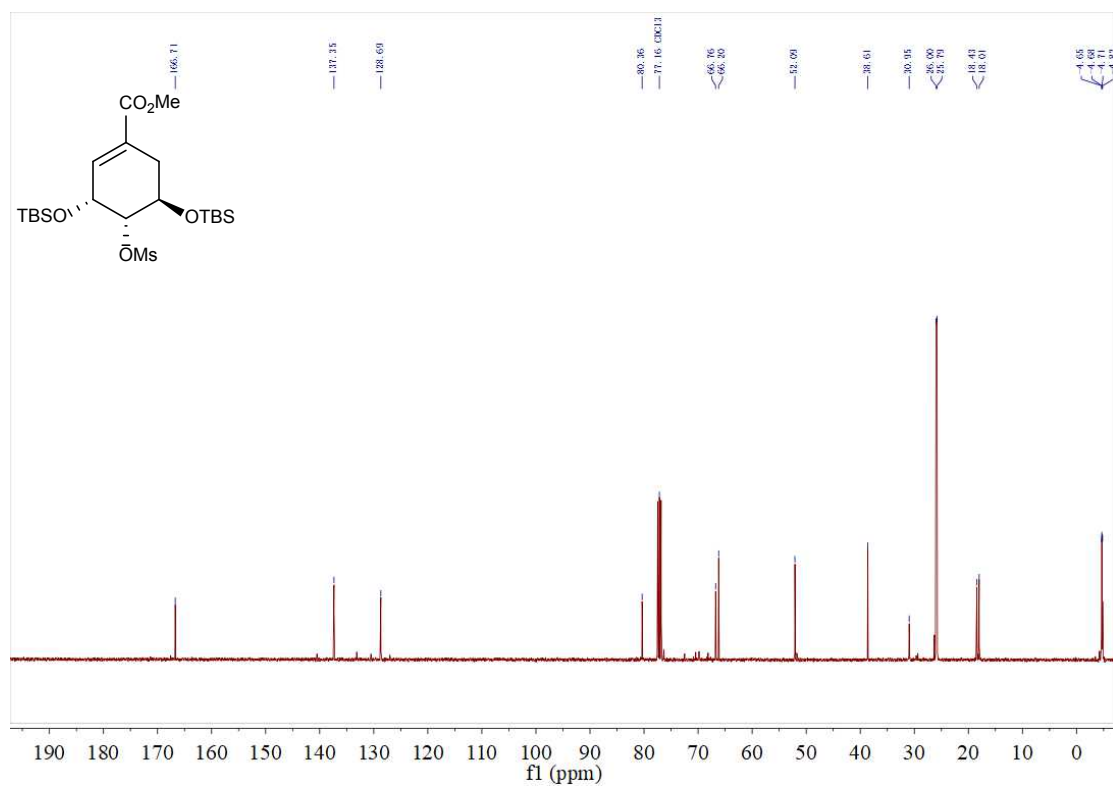

<sup>1</sup>H NMR (400MHz, CDCl<sub>3</sub>) and <sup>13</sup>C NMR (100MHz, CDCl<sub>3</sub>) spectra of **13**

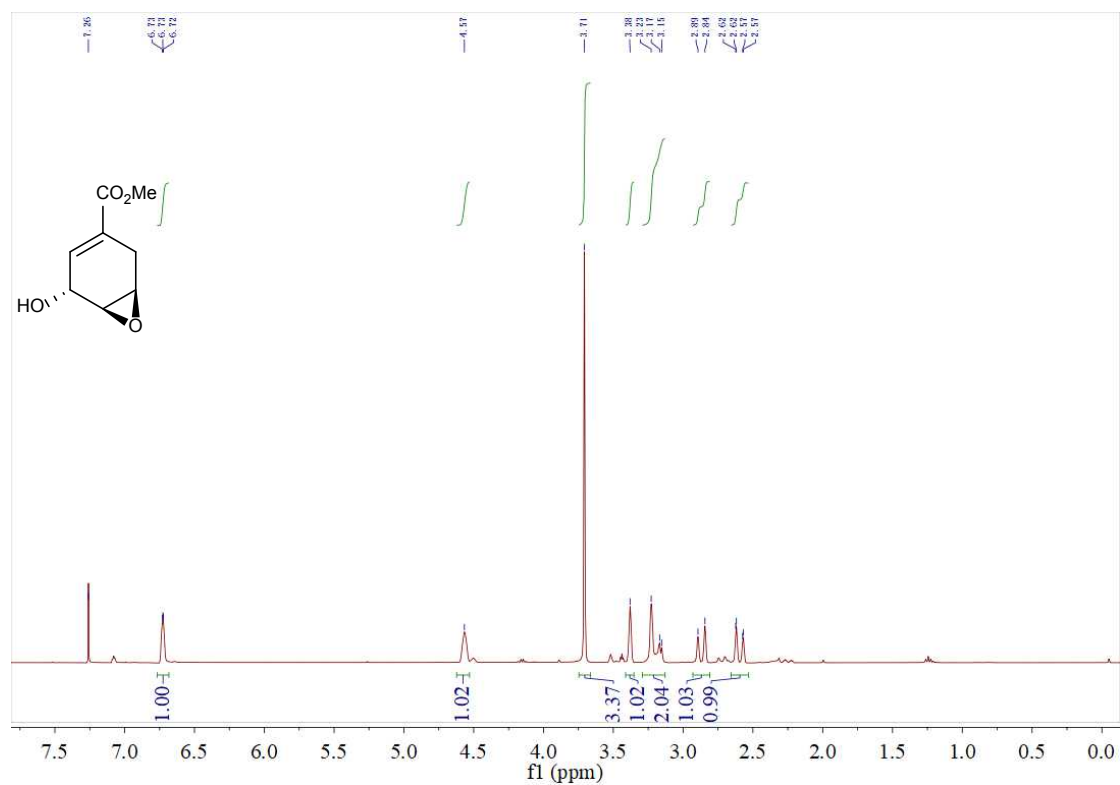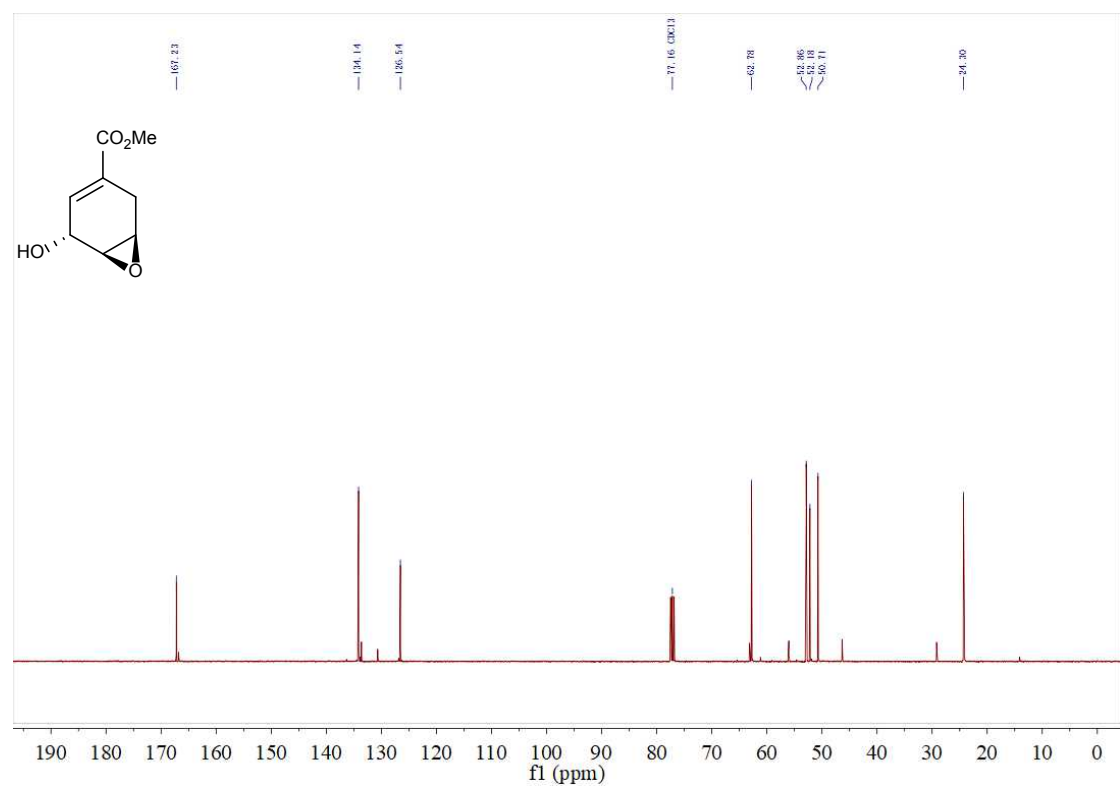

<sup>1</sup>H NMR (400MHz, CDCl<sub>3</sub>) and <sup>13</sup>C NMR (100MHz, CDCl<sub>3</sub>) spectra of **14**

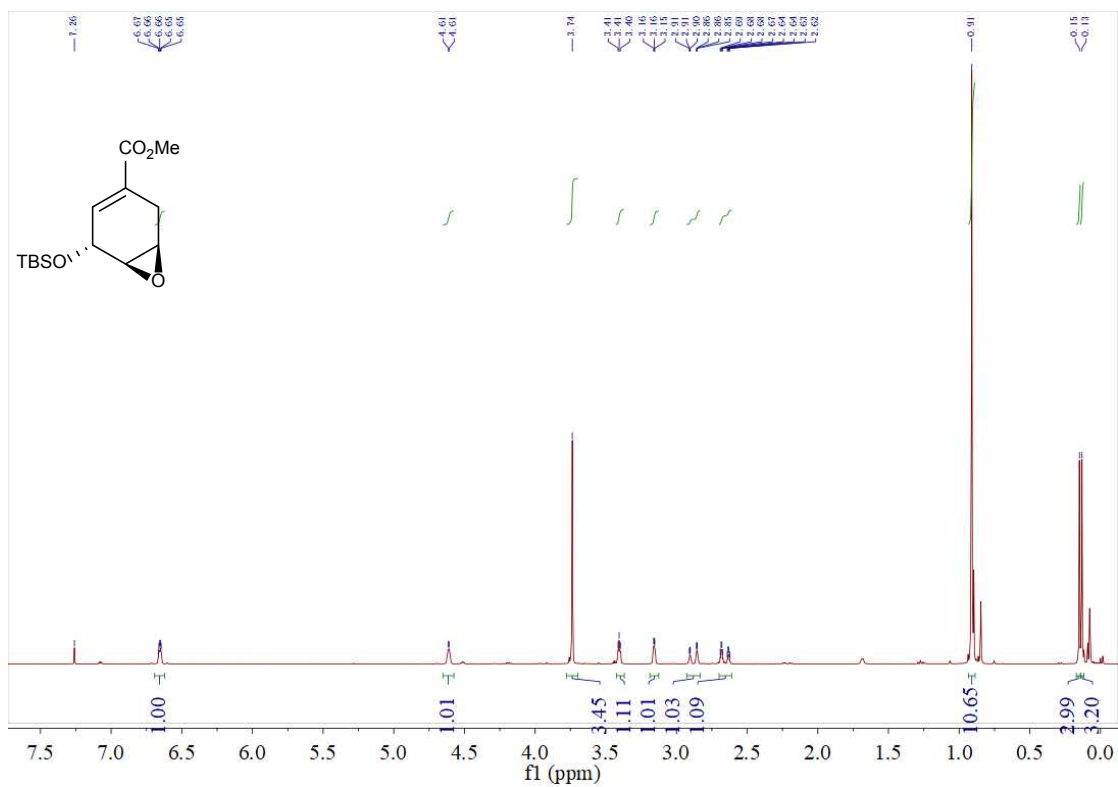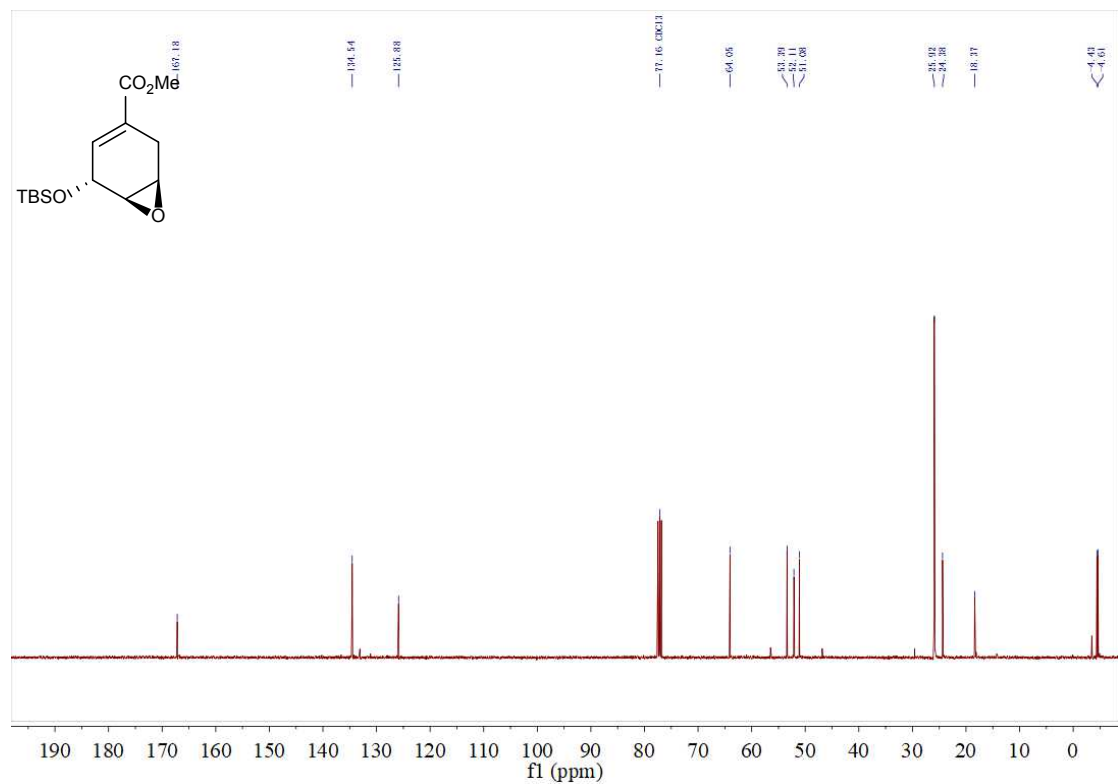

$^1\text{H}$  NMR (400MHz,  $\text{CDCl}_3$ ) and  $^{13}\text{C}$  NMR (100MHz,  $\text{CDCl}_3$ ) spectra of **15**

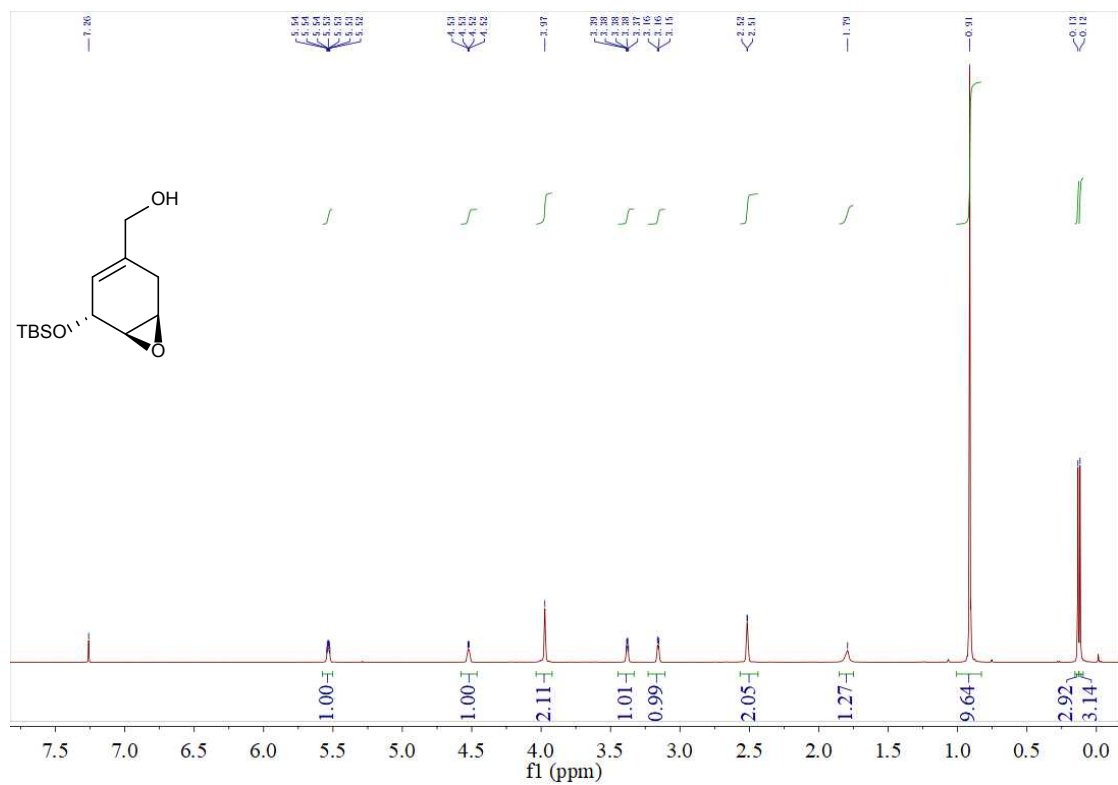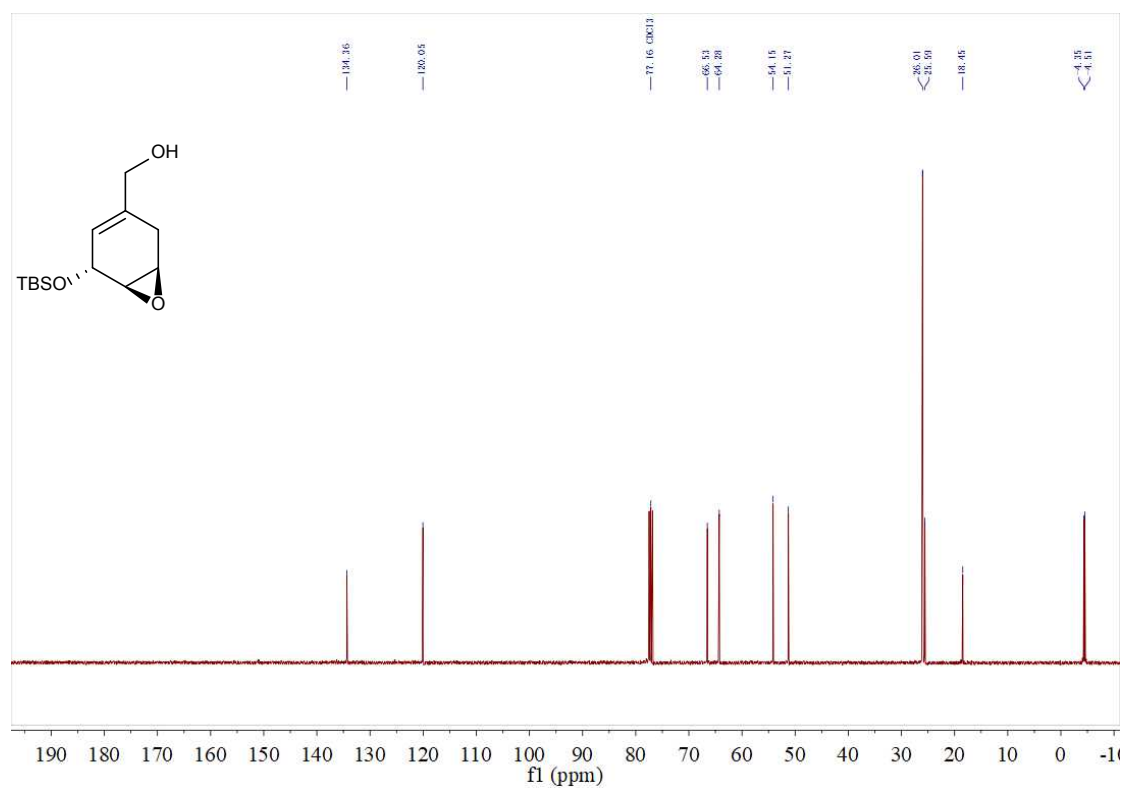

$^1\text{H}$  NMR (400MHz,  $\text{CDCl}_3$ ) and  $^{13}\text{C}$  NMR (100MHz,  $\text{CDCl}_3$ ) spectra of **19**

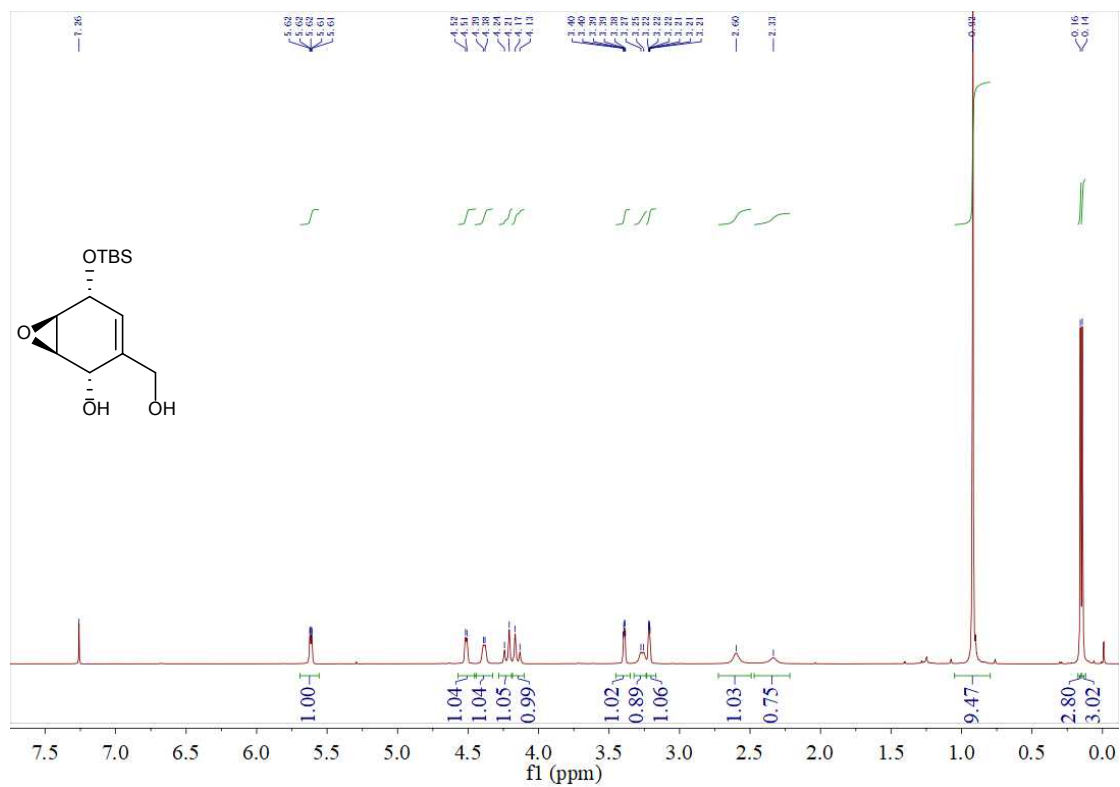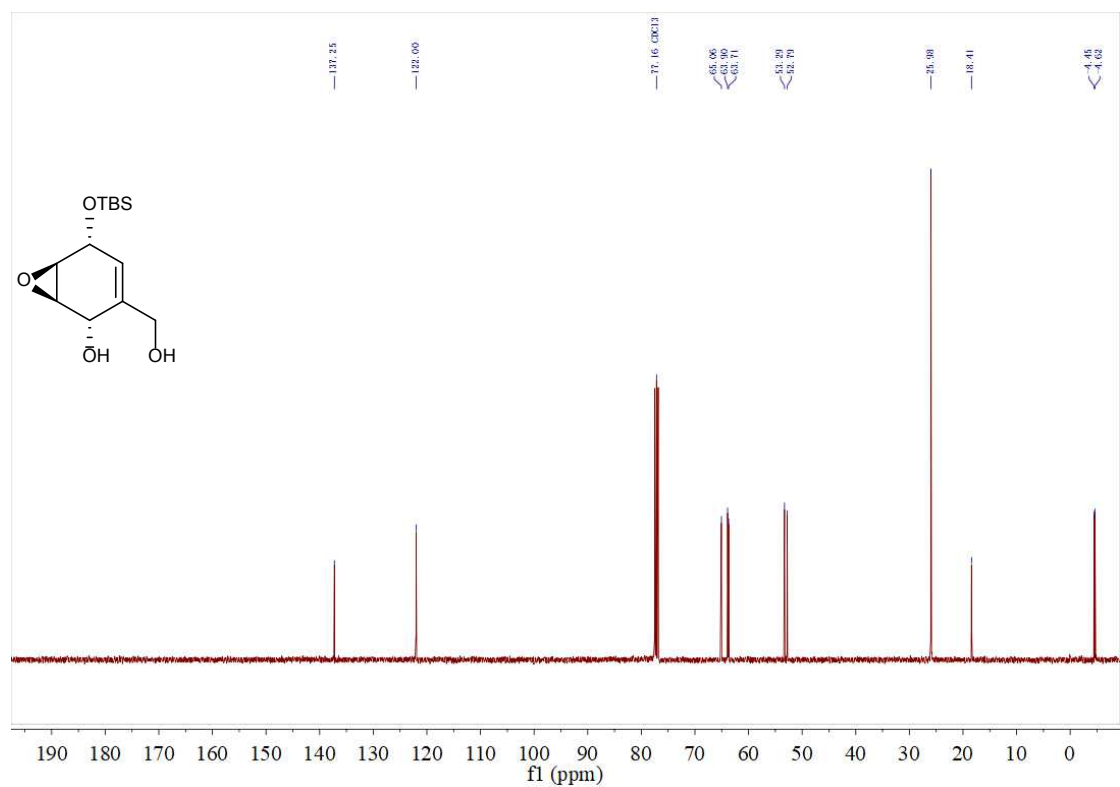



$^1\text{H}$  NMR (400MHz,  $\text{CDCl}_3$ ) and  $^{13}\text{C}$  NMR (100MHz,  $\text{CDCl}_3$ ) spectra of **20**

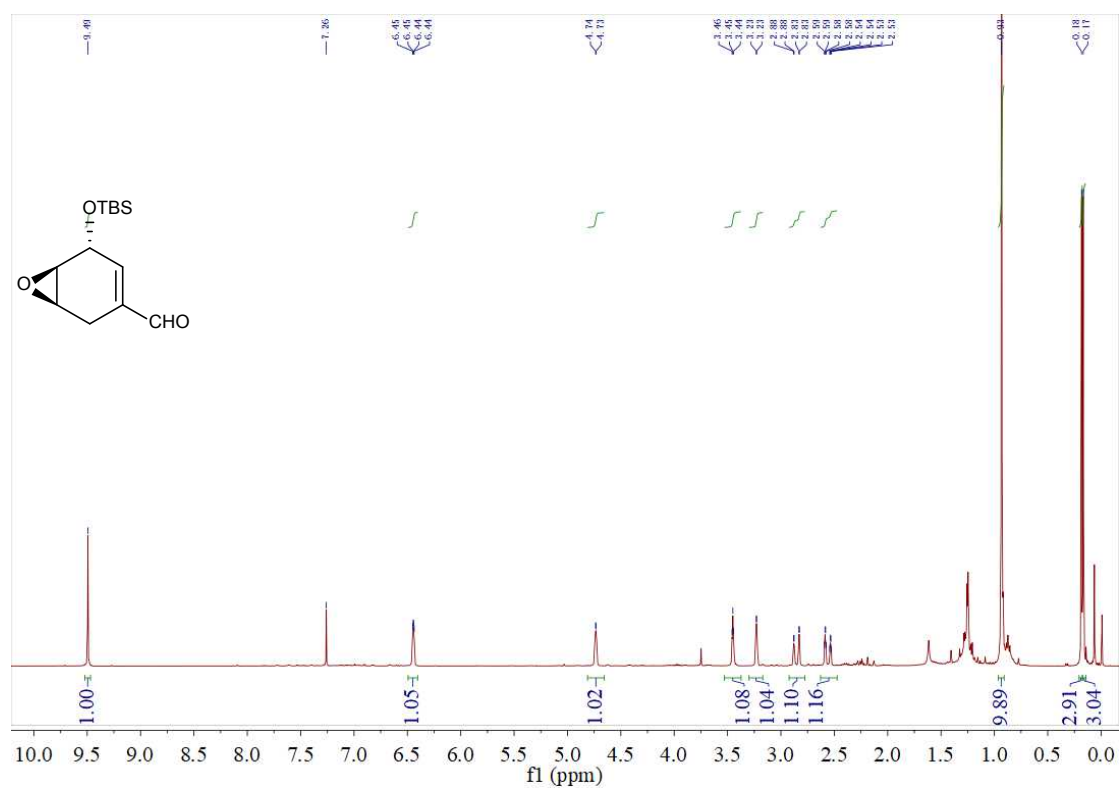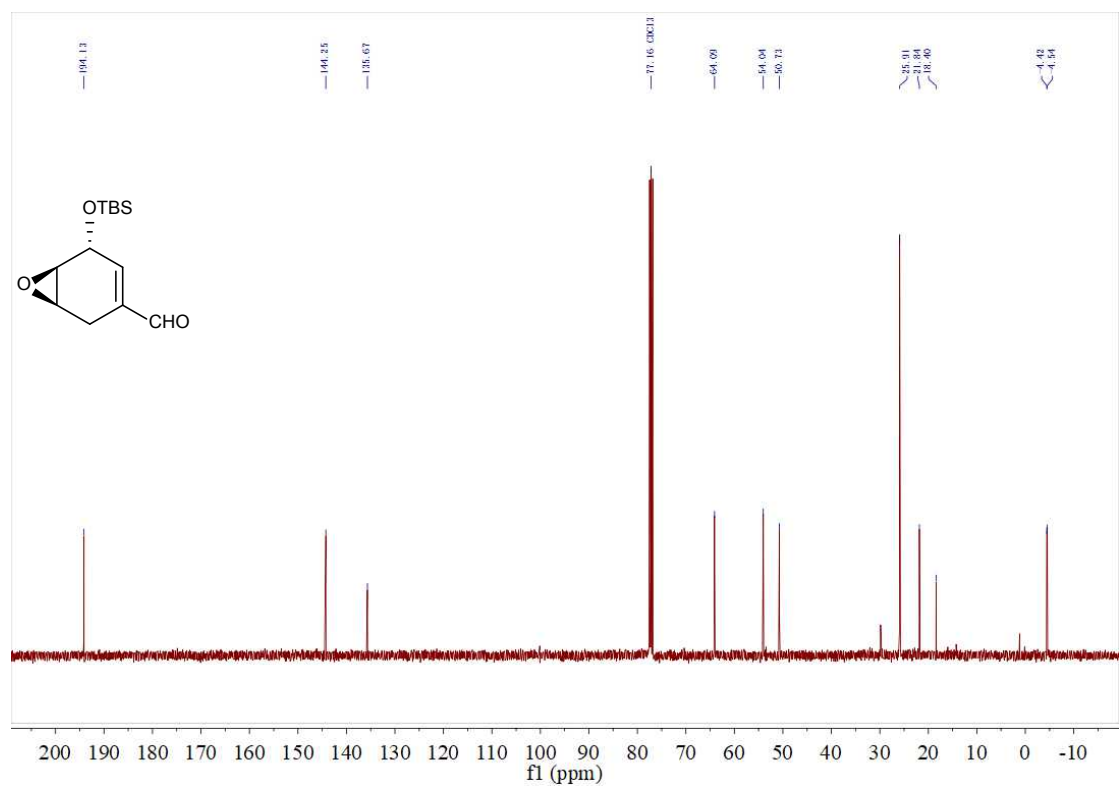

$^1\text{H}$  NMR (400MHz,  $\text{CDCl}_3$ ) and  $^{13}\text{C}$  NMR (100MHz,  $\text{CDCl}_3$ ) spectra of **22**

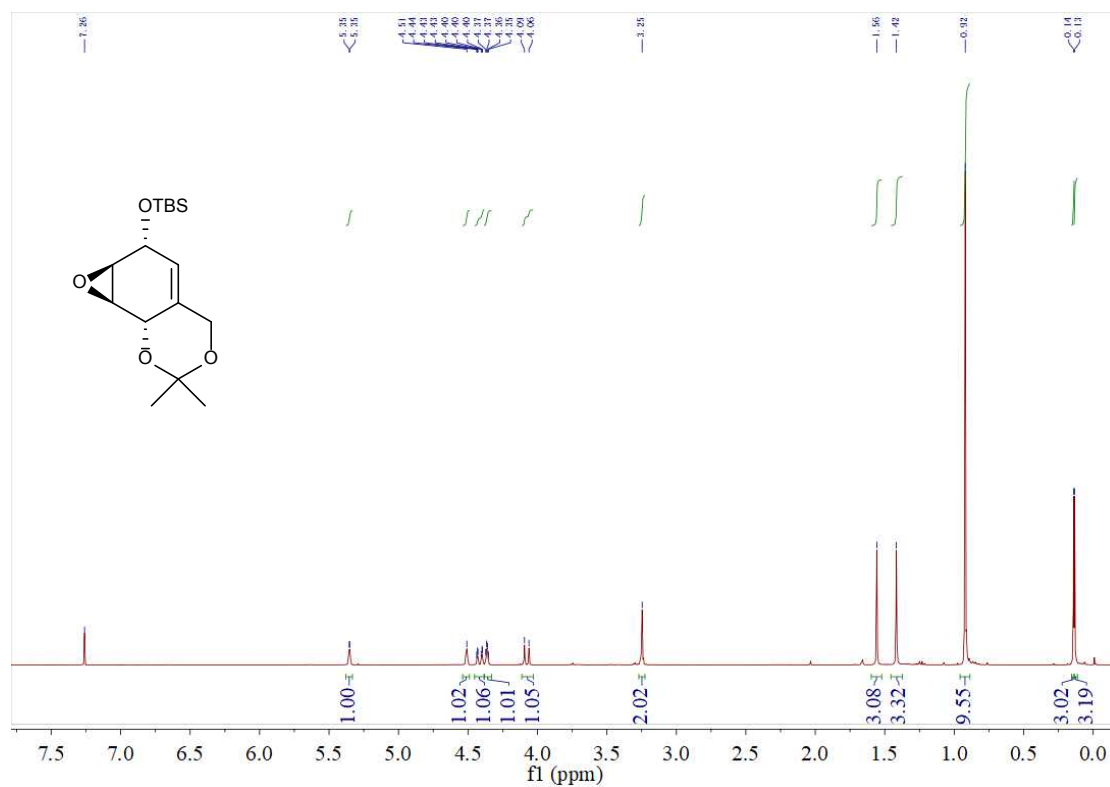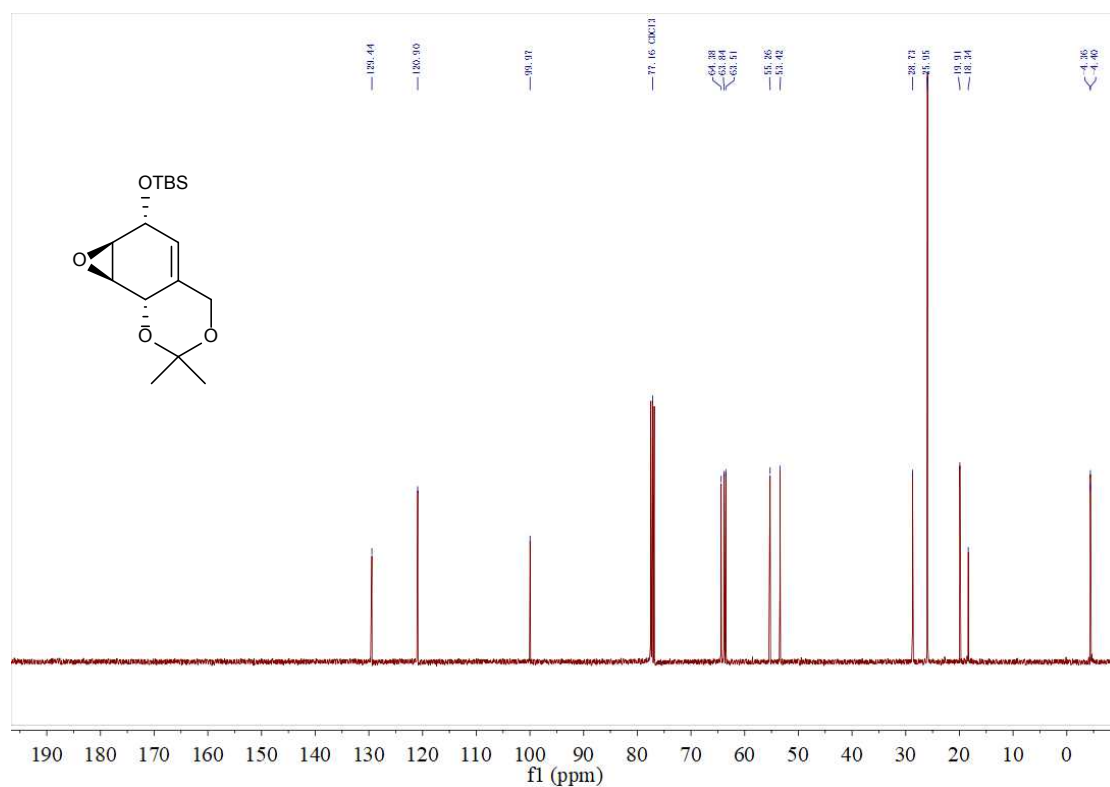

<sup>1</sup>H NMR (400MHz, CDCl<sub>3</sub>) and <sup>13</sup>C NMR (100MHz, CDCl<sub>3</sub>) spectra of **23**

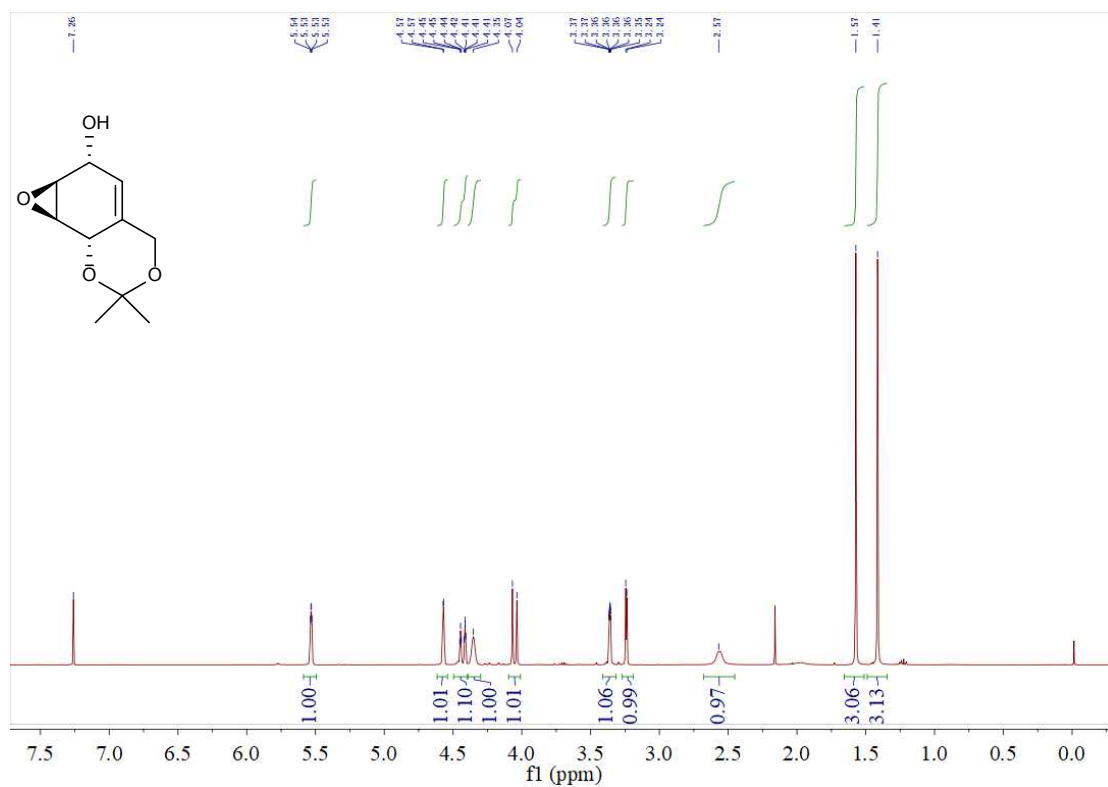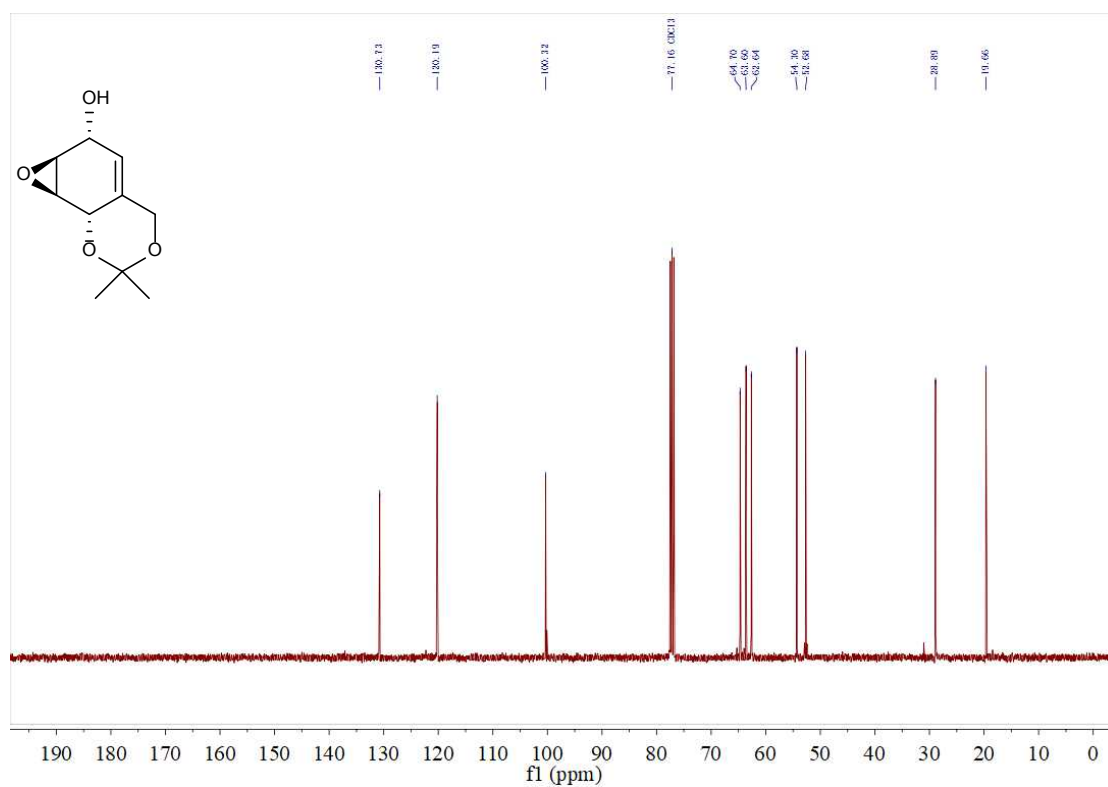

<sup>1</sup>H NMR (400MHz, CDCl<sub>3</sub>) and <sup>13</sup>C NMR (100MHz, CDCl<sub>3</sub>) spectra of **24**

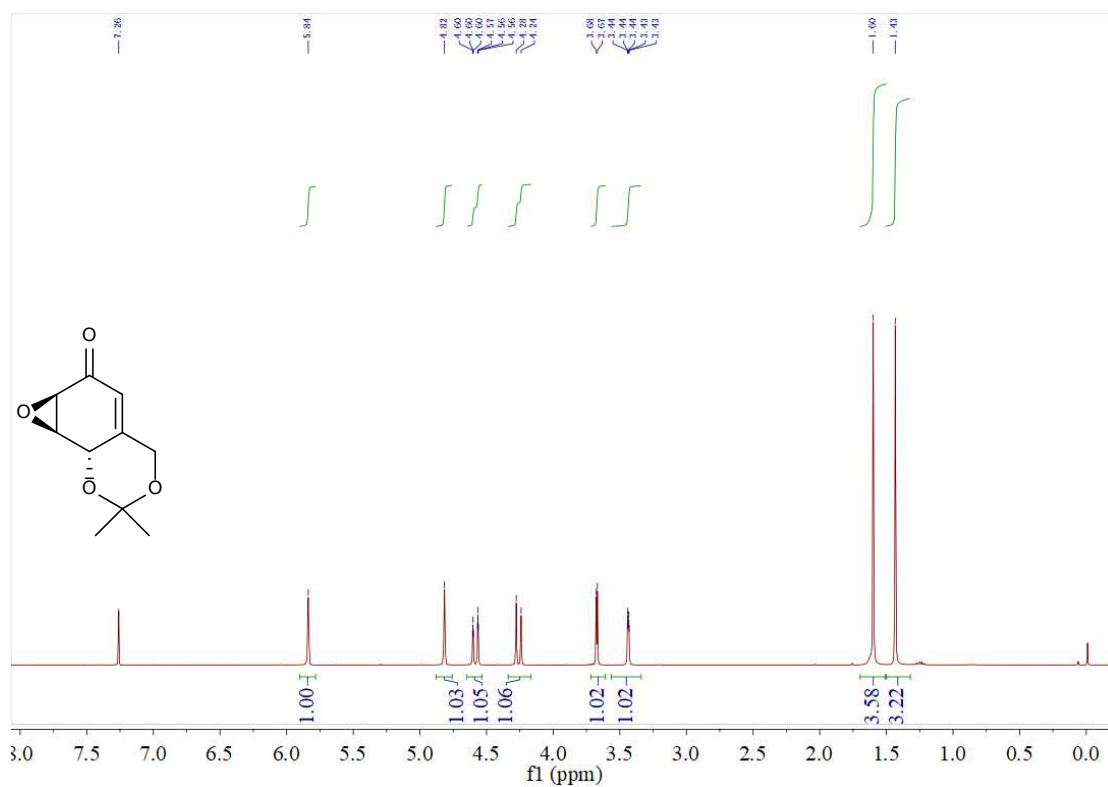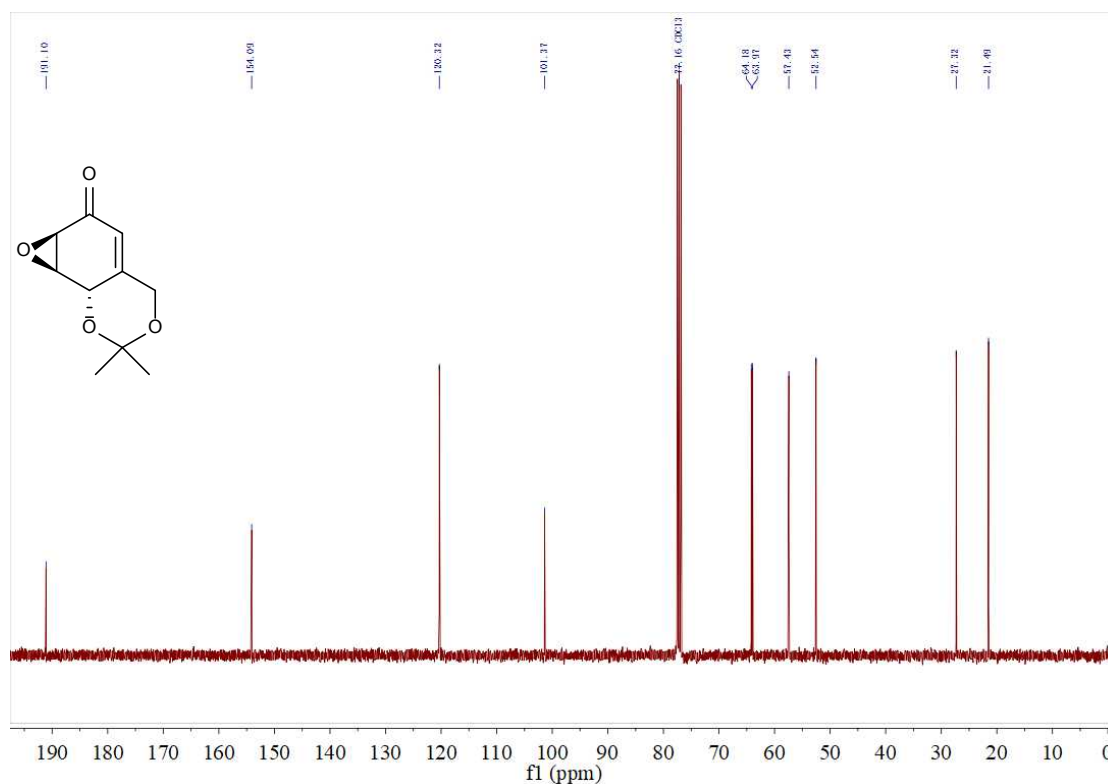

$^1\text{H}$  NMR (400 MHz,  $\text{CD}_3\text{COCD}_3$ ) and  $^{13}\text{C}$  NMR (100 MHz,  $\text{CD}_3\text{COCD}_3$ ) of RKTS-33

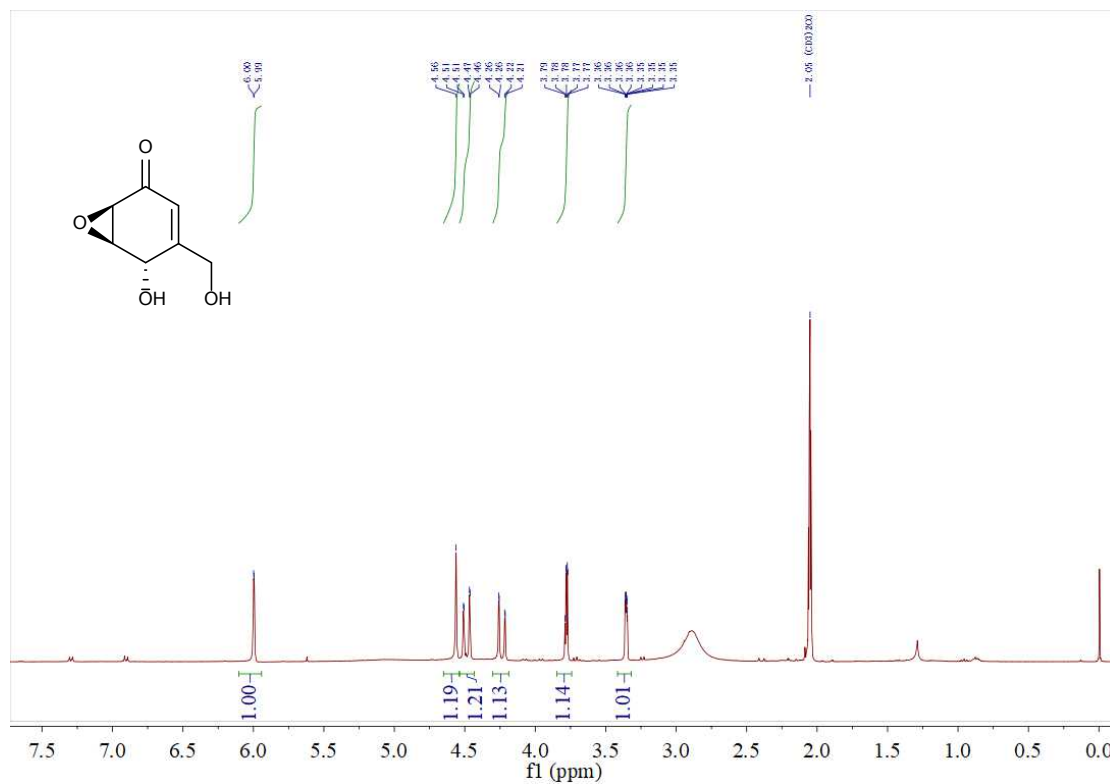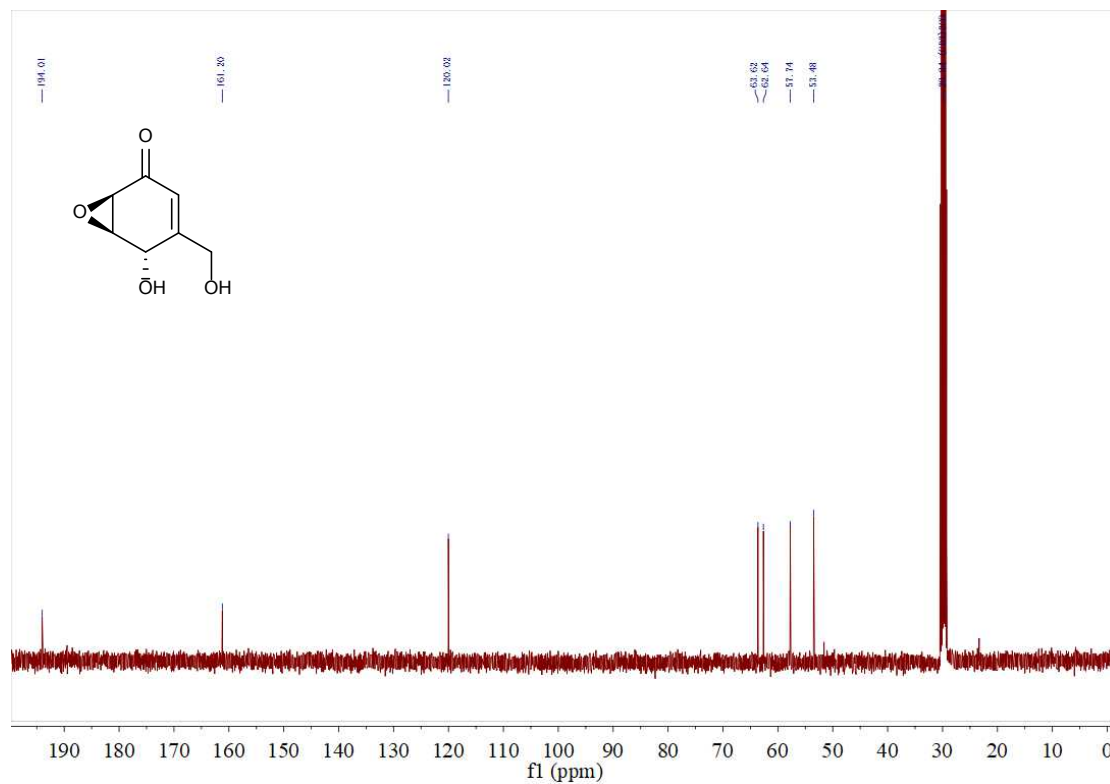

$^1\text{H}$  NMR (400MHz,  $\text{CDCl}_3$ ) and  $^{13}\text{C}$  NMR (100MHz,  $\text{CDCl}_3$ ) spectra of **25**

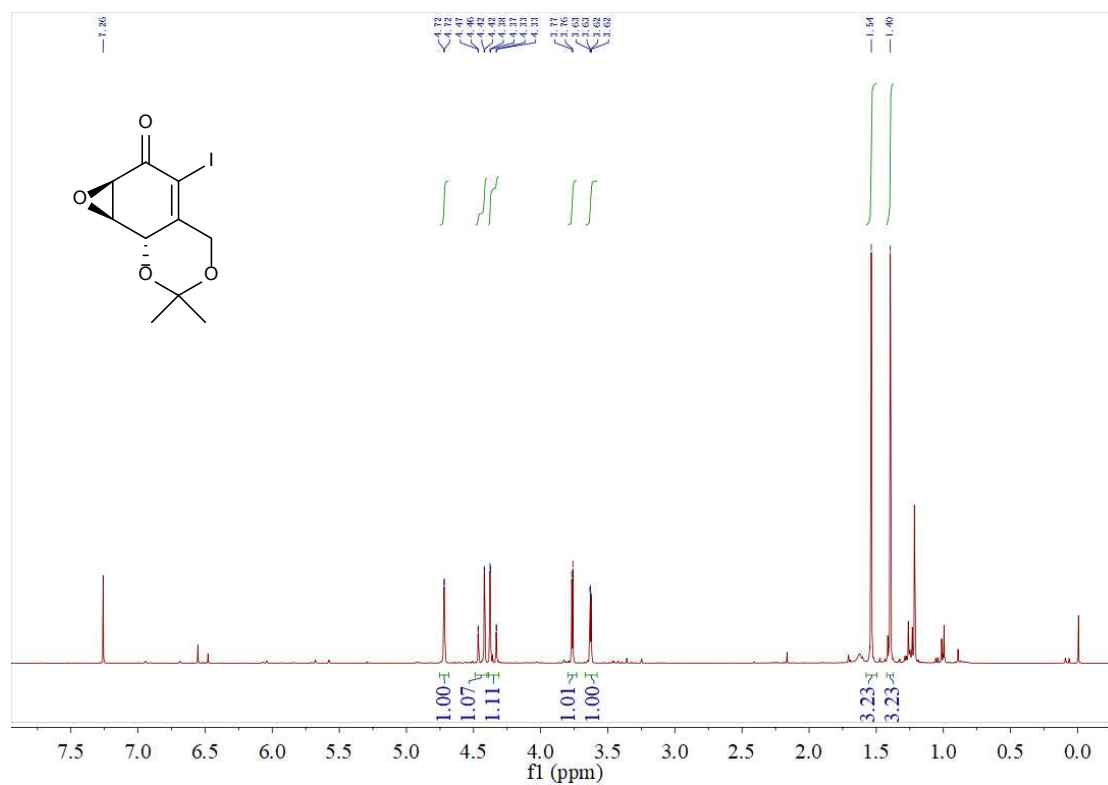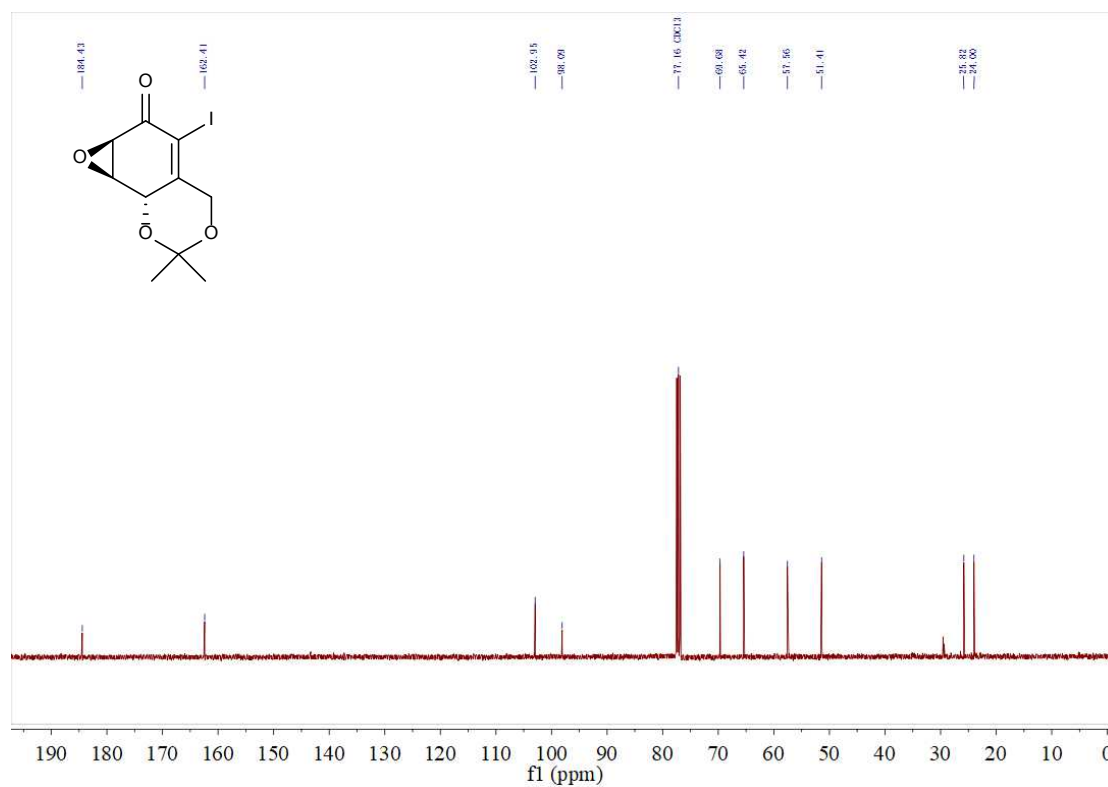

$^1\text{H}$  NMR (400MHz,  $\text{CDCl}_3$ ) and  $^{13}\text{C}$  NMR (100MHz,  $\text{CDCl}_3$ ) spectra of **26**

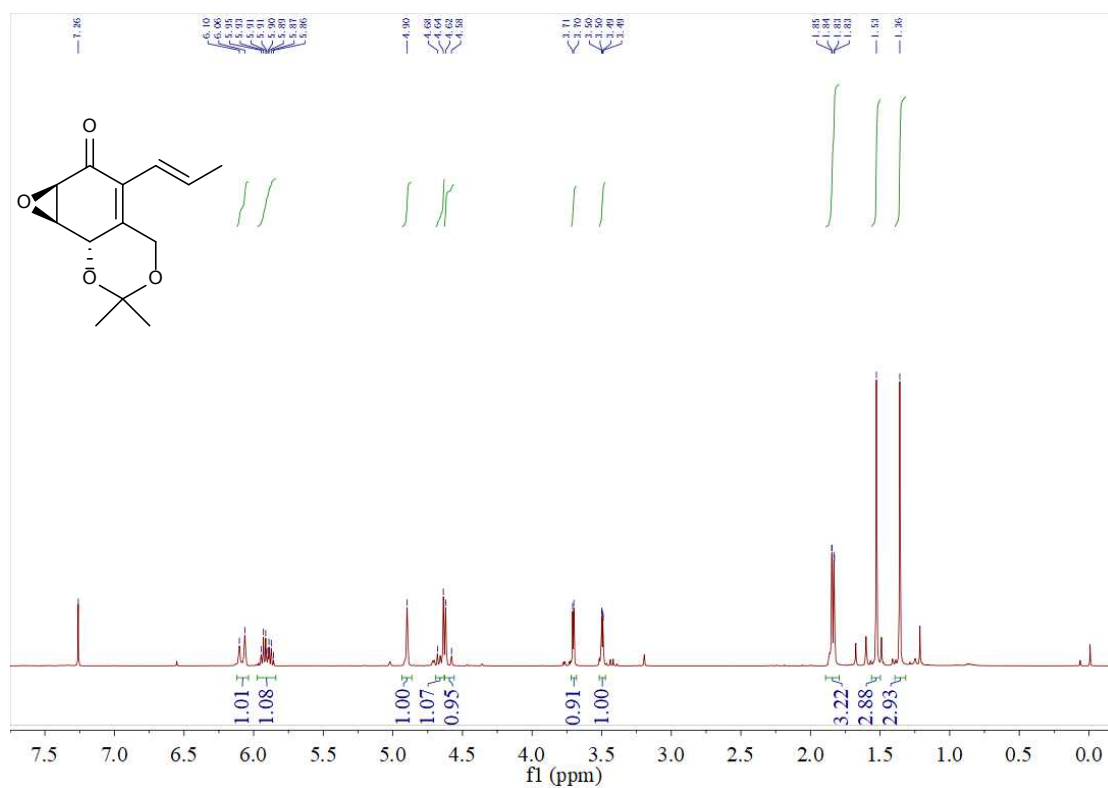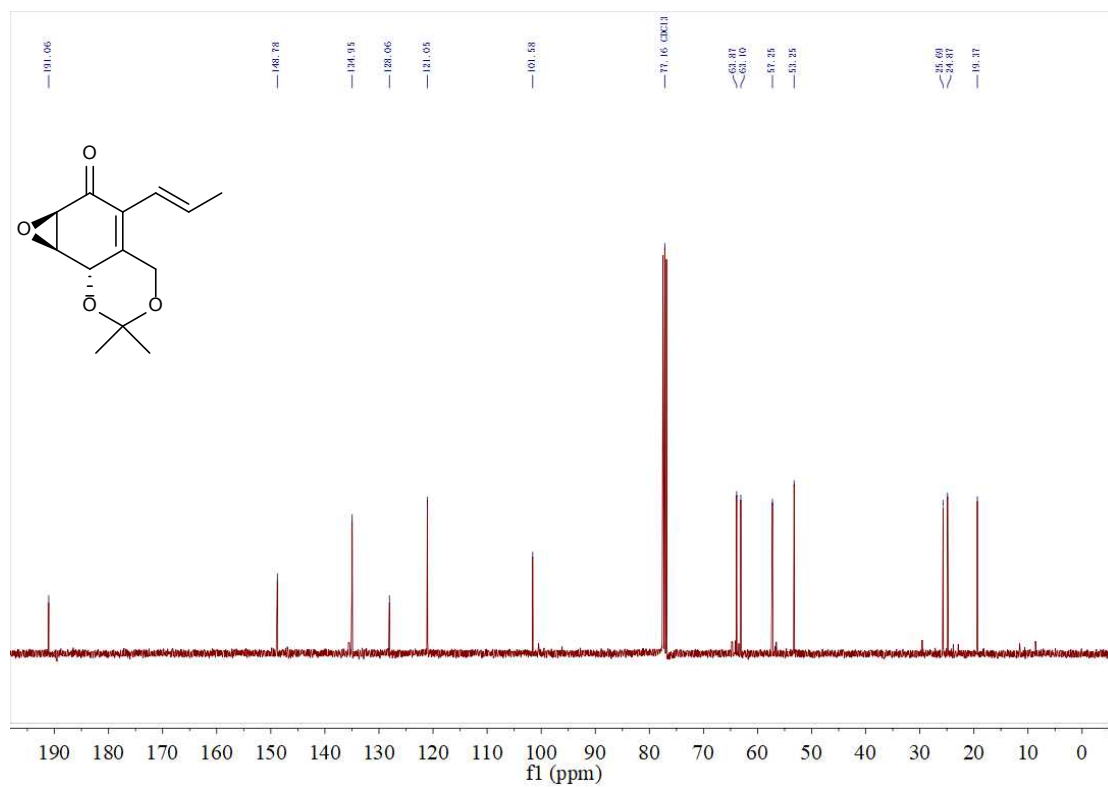

$^1\text{H}$  NMR (400MHz,  $\text{CDCl}_3$ ) and  $^{13}\text{C}$  NMR (100MHz,  $\text{CDCl}_3$ ) spectra of ECH (**1**)

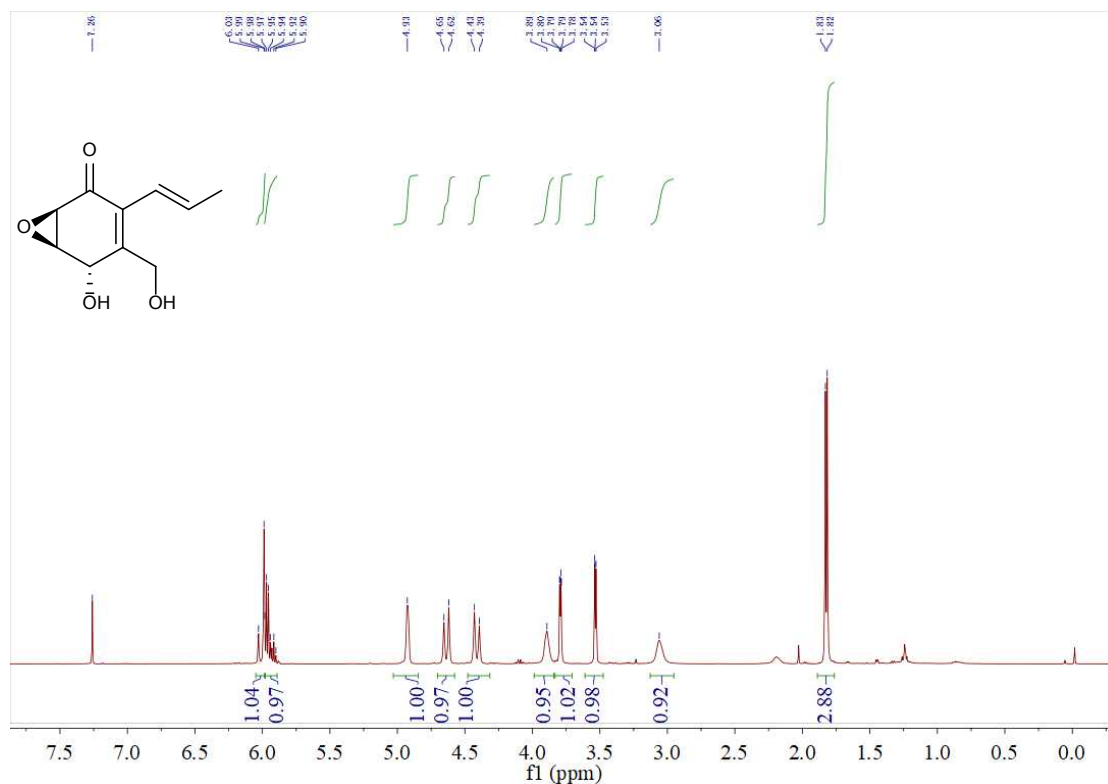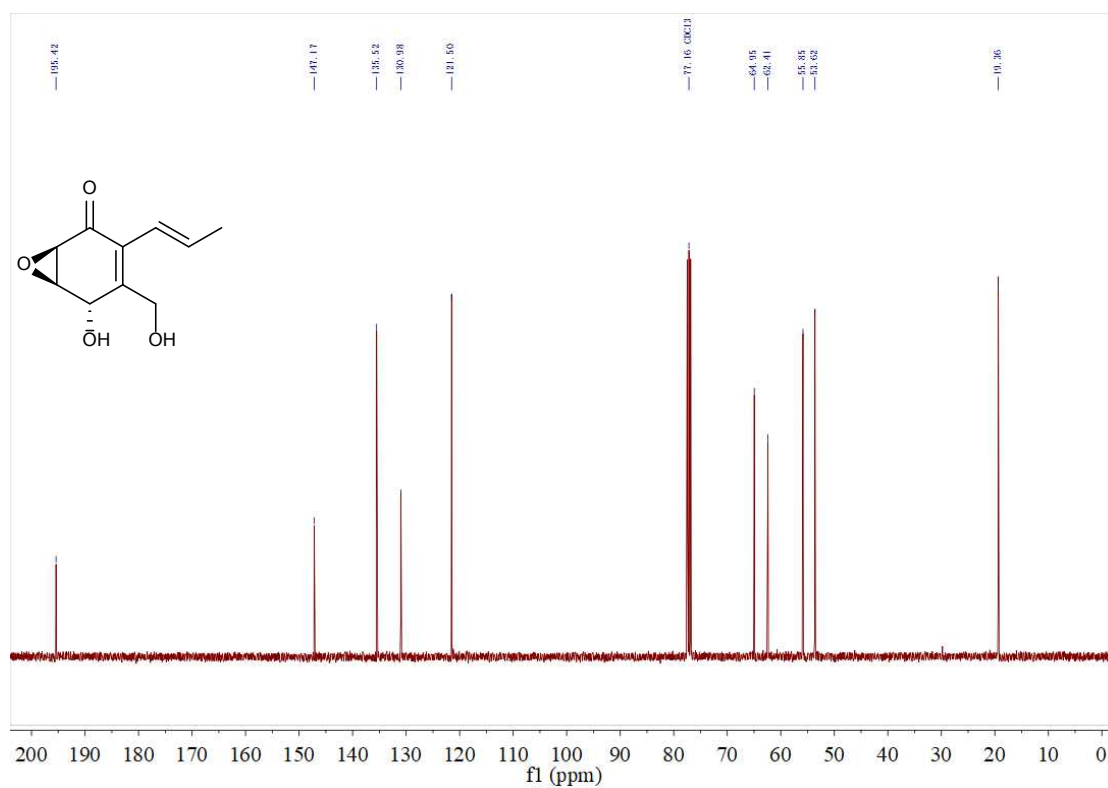



$^1\text{H}$  NMR (400MHz,  $\text{CD}_3\text{COCD}_3$ ) and  $^{13}\text{C}$  NMR (100MHz,  $\text{CD}_3\text{COCD}_3$ ) spectra of epoxyquinol A

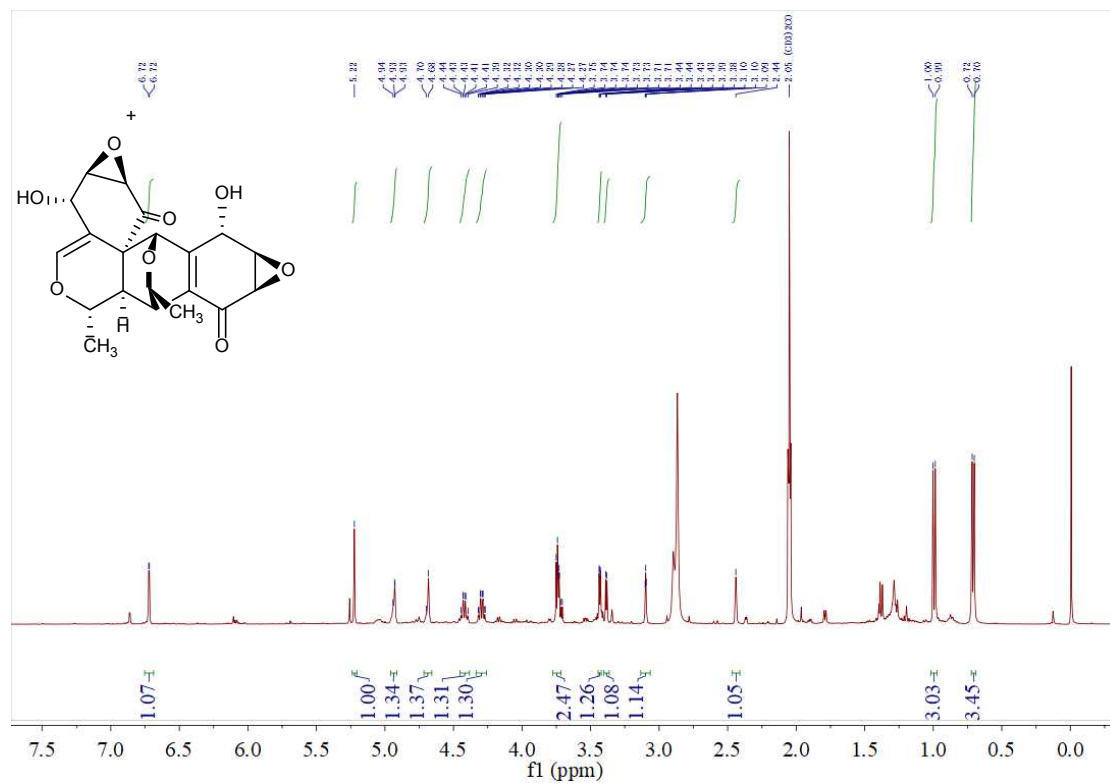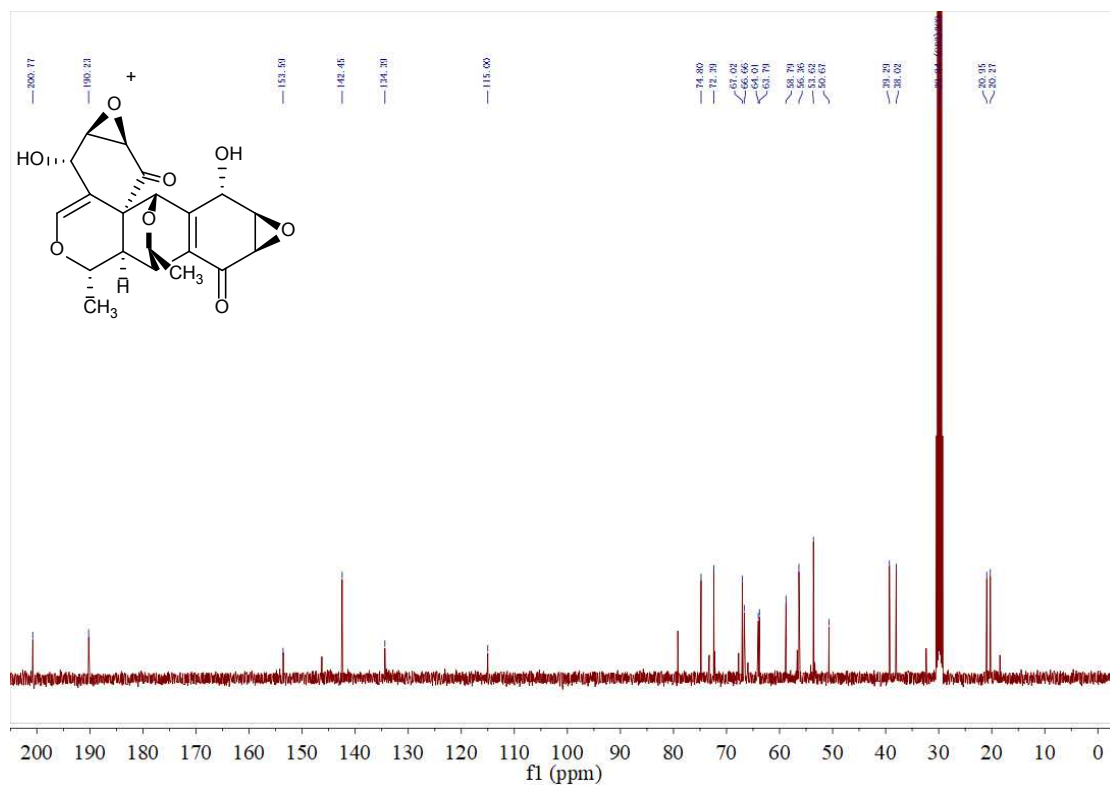

$^1\text{H}$  NMR (400MHz,  $\text{CD}_3\text{COCD}_3$ ) and  $^{13}\text{C}$  NMR (100MHz,  $\text{CD}_3\text{COCD}_3$ ) spectra of epoxyquinol B

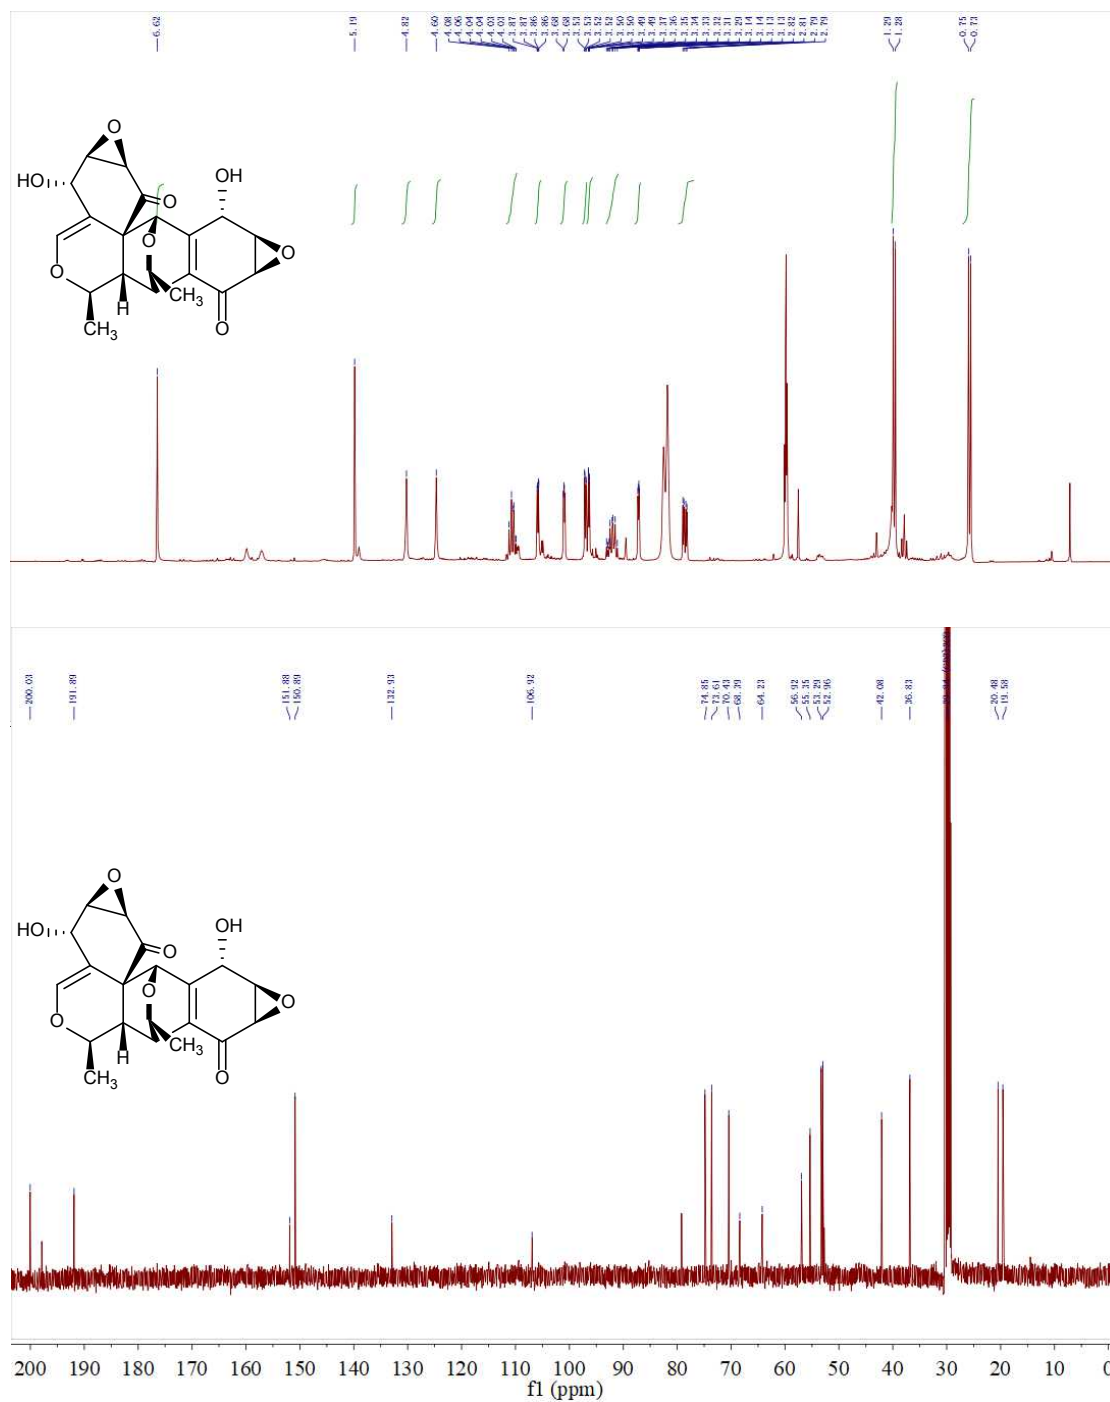

$^1\text{H}$  NMR (400MHz,  $\text{CDCl}_3$ ) and  $^{13}\text{C}$  NMR (100MHz,  $\text{CDCl}_3$ ) spectra of EqM (**4**)

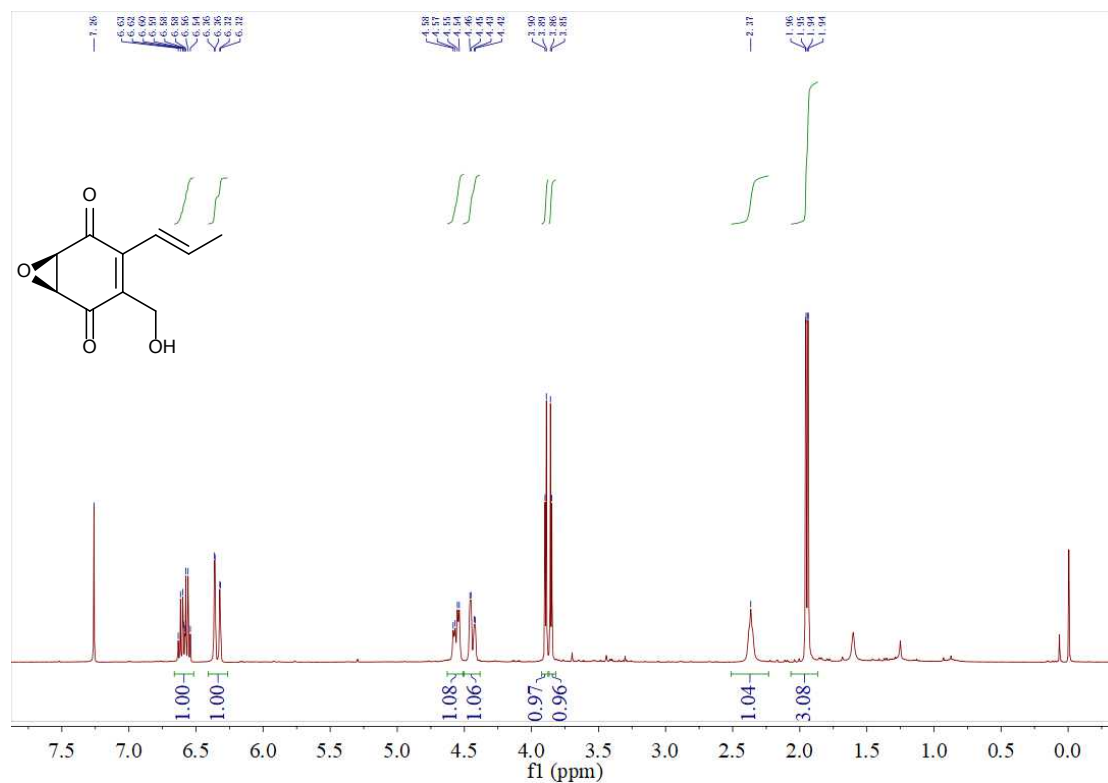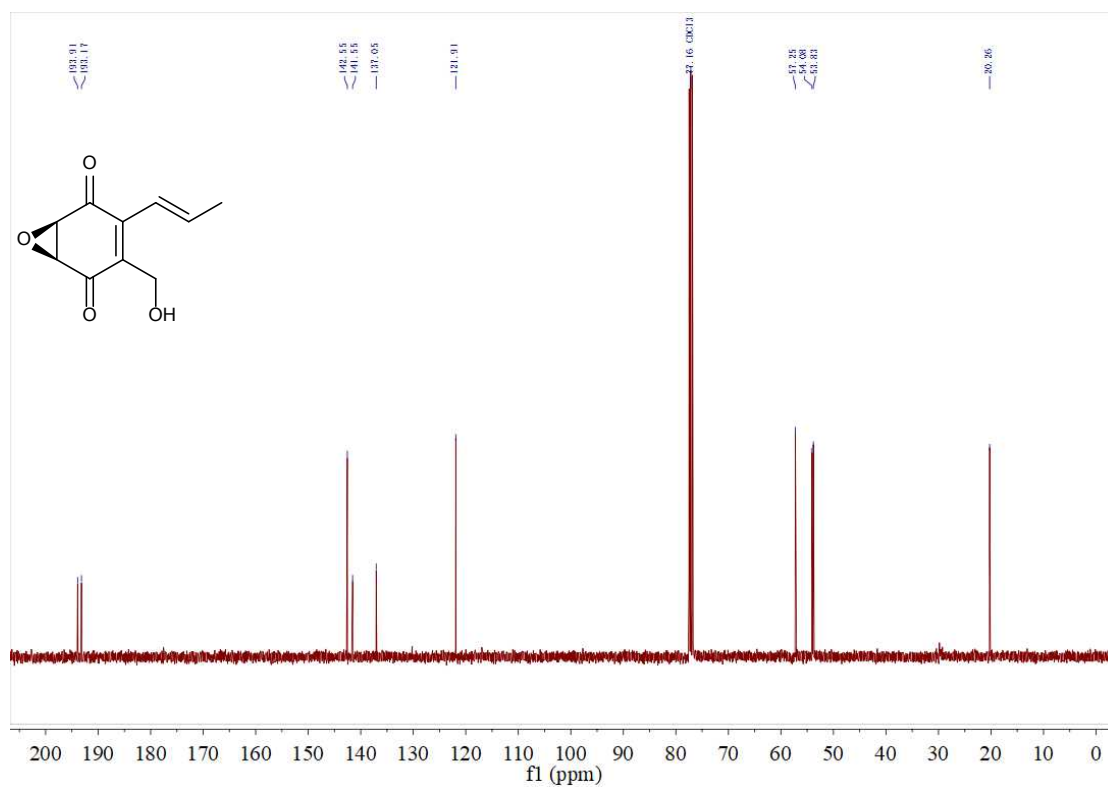

Supplement: d2ob00559j1.pdf [file d2ob00559j1.pdf]
